# Supplementary material for: Vibrio Zinc-Metalloprotease Causes Photoinactivation of Coral Endosymbionts and Coral Tissue Lesions
Source: PLoS One. 2009 Feb 19;4(2):e4511. doi: 10.1371/journal.pone.0004511 (PMC2637982; doi:10.1371/journal.pone.0004511)
Supplement: Text S1 — Effect of ZnCl2 on proteolytic activity (0.03 MB DOC) [file pone.0004511.s004.doc]

**Supporting Information Text S1: Effect of ZnCl2 on proteolytic activity**

Inhibition of pathogen P1 supernatant by EDTA reached 98% following exposure to 50mM EDTA (Fig. S1B). At lower concentrations, inhibition dropped to 87%, when P1 supernatant was exposed to a 5mM concentration and 91% and 96% when exposed to 10mM and 25mM, respectively. When 10mM ZnCl2 were added to EDTA-inhibited samples, P1 supernatant recovered 77% of its proteolytic activity prior to EDTA inhibition (Fig. S1C). When treated with other ZnCl2 concentrations, recovery was significantly lower, with 61% recovery following the addition of 5mM ZnCl2 and 35% recovery following the addition of 25mM ZnCl2. Following the addition of higher ZnCl2 concentrations (50mM and 100mM), no recovery was detected by the asocasein assay [49-50], suggesting that the P1 harbors a zinc-metalloprotease that needs an optimal concentration of ZnCl2 for activity (Fig. S1C). To test this, P1 supernatant was incubated with five concentration of ZnCl2 (5mM, 10mM, 25mm, 50mM and 100mM) without prior inhibitory treatment with EDTA. Results demonstrated that the proteolytic activity of P1 supernatant was significantly affected by excess ZnCl2 in all treatments, with a 95% loss of activity measured in the 10mM-100mM concentrations and 81% activity-loss when 5mM ZnCl2 were added to the supernatant (data not shown). Similar inhibition was demonstrated when exposing the *H. pylori* zinc-metalloprotease to zinc concentrations above 1mM [49]. Other zinc peptides are also inhibited by excess zinc (competitive inhibition), which is proposed to result from the formation of zinc monohydroxide multidentate complexes which bridge the catalytic zinc to a side chain on the active site [136].
